# Supplementary material
Source: PubMed Central journal article supplement (PMC6955399)

# Supplementary figure 1

## Previous 2 Years (2011-2012)

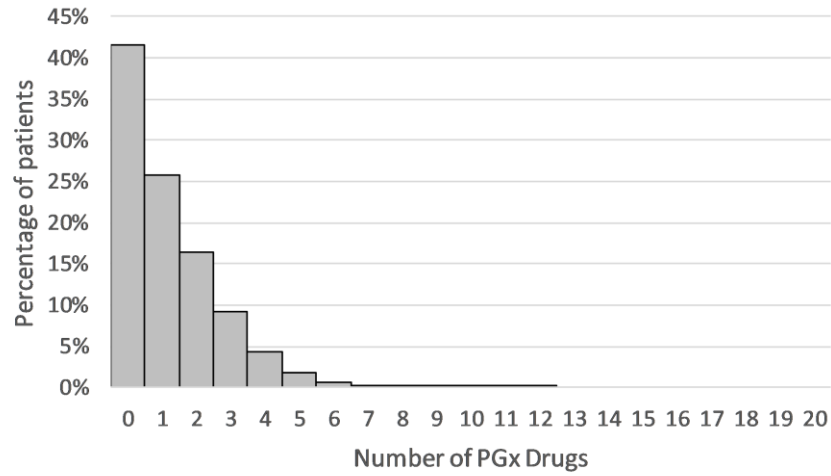

## Previous 10 Years (2003-2012)

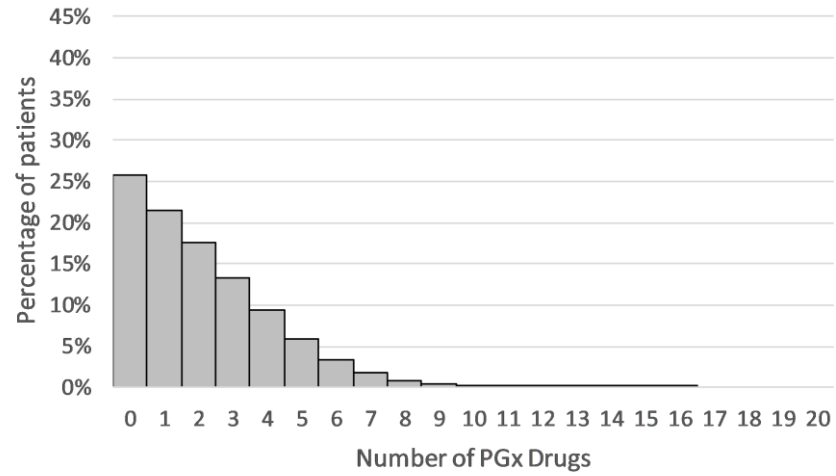

## Previous 20 Years (1993-2012)

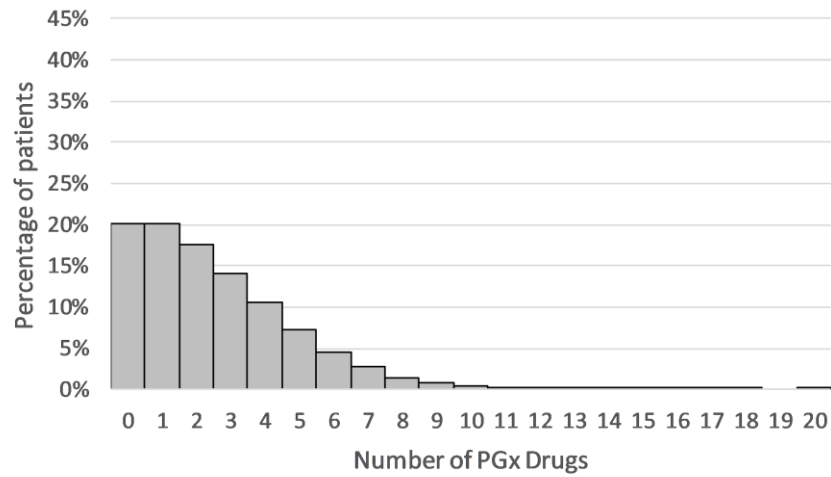

## Following 5 Years (2013-2017)

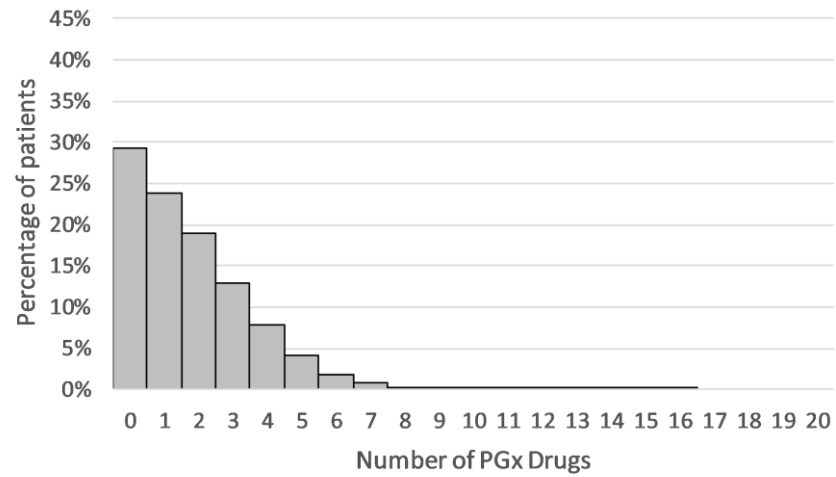

Supplement: BCP-85-2734-s001.pdf [file BCP-85-2734-s001.pdf]
